# Supplementary material
Source: PubMed Central journal article supplement (PMC4716613)
Supplement: NIHMS734559-supplement-Supp_DATA_S1.pdf [file NIHMS734559-supplement-Supp_DATA_S1.pdf]

# Appendix 1. HEART Pathway Assessment Form

|                                                                                                                                                                                                                                                                                                                                                                                            |                                                                                                                                                                                          |                                                                                                                                                                                                                                                                                                                          |
|--------------------------------------------------------------------------------------------------------------------------------------------------------------------------------------------------------------------------------------------------------------------------------------------------------------------------------------------------------------------------------------------|------------------------------------------------------------------------------------------------------------------------------------------------------------------------------------------|--------------------------------------------------------------------------------------------------------------------------------------------------------------------------------------------------------------------------------------------------------------------------------------------------------------------------|
| <b>HEART Score:</b>                                                                                                                                                                                                                                                                                                                                                                        |                                                                                                                                                                                          | <b>Patient ID</b> _____<br><input type="checkbox"/> Initial Assessment<br><input type="checkbox"/> Second Assessment                                                                                                                                                                                                     |
| <b>History:</b>                                                                                                                                                                                                                                                                                                                                                                            |                                                                                                                                                                                          |                                                                                                                                                                                                                                                                                                                          |
| <u>High-Risk Features:</u> <ul style="list-style-type: none"> <li>• Middle- or left-sided</li> <li>• Heavy chest pain</li> <li>• Diaphoresis</li> <li>• Radiation</li> <li>• N/V</li> <li>• Exertional</li> <li>• Relief of symptoms by sublingual nitrates</li> </ul>                                                                                                                     | <u>Low-Risk Features:</u> <ul style="list-style-type: none"> <li>• Well localized</li> <li>• Sharp pain</li> <li>• Non-exertional</li> <li>• No diaphoresis</li> <li>• No N/V</li> </ul> |                                                                                                                                                                                                                                                                                                                          |
| <input type="checkbox"/> Highly Suspicious                                                                                                                                                                                                                                                                                                                                                 | <b>2 points</b>                                                                                                                                                                          | <b>Mostly high-risk features</b>                                                                                                                                                                                                                                                                                         |
| <input type="checkbox"/> Moderately Suspicious                                                                                                                                                                                                                                                                                                                                             | <b>1 point</b>                                                                                                                                                                           | <b>Mixture of high-risk and low-risk features</b>                                                                                                                                                                                                                                                                        |
| <input type="checkbox"/> Slightly Suspicious                                                                                                                                                                                                                                                                                                                                               | <b>0 points</b>                                                                                                                                                                          | <b>Mostly low-risk features</b>                                                                                                                                                                                                                                                                                          |
| <b>ECG:</b>                                                                                                                                                                                                                                                                                                                                                                                |                                                                                                                                                                                          |                                                                                                                                                                                                                                                                                                                          |
| <input type="checkbox"/> New ischemic changes                                                                                                                                                                                                                                                                                                                                              | <b>2 points</b>                                                                                                                                                                          | <ul style="list-style-type: none"> <li>• Ischemic ST-segment depression</li> <li>• New ischemic T-wave inversions</li> </ul>                                                                                                                                                                                             |
| <input type="checkbox"/> Non-specific changes                                                                                                                                                                                                                                                                                                                                              | <b>1 point</b>                                                                                                                                                                           | <ul style="list-style-type: none"> <li>• Repolarization abnormalities</li> <li>• Non-specific T wave changes</li> <li>• Non-specific ST-segment depression or elevation</li> <li>• Bundle branch blocks</li> <li>• Pacemaker rhythms</li> <li>• LVH</li> <li>• Early repolarization</li> <li>• Digoxin effect</li> </ul> |
| <input type="checkbox"/> Normal                                                                                                                                                                                                                                                                                                                                                            | <b>0 points</b>                                                                                                                                                                          | <ul style="list-style-type: none"> <li>• <b>Completely normal</b></li> </ul>                                                                                                                                                                                                                                             |
| <b>Age:</b>                                                                                                                                                                                                                                                                                                                                                                                |                                                                                                                                                                                          |                                                                                                                                                                                                                                                                                                                          |
| <input type="checkbox"/> ≥ 65                                                                                                                                                                                                                                                                                                                                                              | <b>2 points</b>                                                                                                                                                                          |                                                                                                                                                                                                                                                                                                                          |
| <input type="checkbox"/> 45-64                                                                                                                                                                                                                                                                                                                                                             | <b>1 point</b>                                                                                                                                                                           |                                                                                                                                                                                                                                                                                                                          |
| <input type="checkbox"/> <45                                                                                                                                                                                                                                                                                                                                                               | <b>0 points</b>                                                                                                                                                                          |                                                                                                                                                                                                                                                                                                                          |
| <b>Risk Factors:</b>                                                                                                                                                                                                                                                                                                                                                                       |                                                                                                                                                                                          |                                                                                                                                                                                                                                                                                                                          |
| <input type="checkbox"/> Obesity (BMI ≥30)<br><input type="checkbox"/> Current or recent (≤90 days) smoker<br><input type="checkbox"/> Currently treated diabetes mellitus<br><input type="checkbox"/> Family history of CAD (1 <sup>st</sup> degree relative <55 y.o.)<br><input type="checkbox"/> Diagnosed and/or treated hypertension<br><input type="checkbox"/> Hypercholesterolemia |                                                                                                                                                                                          |                                                                                                                                                                                                                                                                                                                          |
| <input type="checkbox"/> <b>3 or more risk factors listed above OR any of the following:</b>                                                                                                                                                                                                                                                                                               | <b>2 points</b>                                                                                                                                                                          |                                                                                                                                                                                                                                                                                                                          |
| <input type="checkbox"/> Known CAD=2 points <input type="checkbox"/> Prior stroke=2 points<br><input type="checkbox"/> Peripheral arterial disease = 2 points                                                                                                                                                                                                                              |                                                                                                                                                                                          |                                                                                                                                                                                                                                                                                                                          |
| <input type="checkbox"/> 1-2 risk factors                                                                                                                                                                                                                                                                                                                                                  | <b>1 point</b>                                                                                                                                                                           |                                                                                                                                                                                                                                                                                                                          |
| <input type="checkbox"/> No risk factors                                                                                                                                                                                                                                                                                                                                                   | <b>0 points</b>                                                                                                                                                                          |                                                                                                                                                                                                                                                                                                                          |
| <b>Troponin (initial)</b>                                                                                                                                                                                                                                                                                                                                                                  |                                                                                                                                                                                          |                                                                                                                                                                                                                                                                                                                          |
| <input type="checkbox"/> >0.120 ng/ml                                                                                                                                                                                                                                                                                                                                                      | <b>2 points</b>                                                                                                                                                                          |                                                                                                                                                                                                                                                                                                                          |
| <input type="checkbox"/> 0.041-0.120 ng/ml                                                                                                                                                                                                                                                                                                                                                 | <b>1 point</b>                                                                                                                                                                           |                                                                                                                                                                                                                                                                                                                          |
| <input type="checkbox"/> 0-0.040 ng/ml                                                                                                                                                                                                                                                                                                                                                     | <b>0 points</b>                                                                                                                                                                          |                                                                                                                                                                                                                                                                                                                          |
| <b>HEART Score (total points)</b>                                                                                                                                                                                                                                                                                                                                                          | _____                                                                                                                                                                                    | Add points from each category above                                                                                                                                                                                                                                                                                      |

**Serial 3 Hour Troponin Measurement:**

- Normal, 0-0.040 ng/ml
- Positive, >0.040 ng/ml

**HEART Pathway:**

- High Risk = HEART score 4 or more, or any positive troponin.
- Low Risk = HEART score 0-3 and negative troponins at 0 and 3 hours

Attending Signature: \_\_\_\_\_ Date: \_\_\_\_\_  
 Attending Name: \_\_\_\_\_
