# Supplementary material
Source: PubMed Central journal article supplement (PMC4716613)
Supplement: NIHMS734559-supplement-Supp_DATA_S2.pdf [file NIHMS734559-supplement-Supp_DATA_S2.pdf]

**Appendix 2.** Risk Taking Scale (RTS), Stress from Uncertainty Scale (SUS), and Fear of Malpractice Scale (FMS). RTS & SUS items are scored on a 6 point Likert Scale, FMS items are scored on a 5 point Likert Scale.

### Risk-taking scale

1. I enjoy taking risks.
2. I try to avoid situations that have uncertain outcomes.
3. Taking risks does not bother me if the gains involved are high.
4. I consider security and important element in every aspect of my life.
5. People have told me that I seem to enjoy taking chances.
6. I rarely, if ever, take risks when there is another alternative.

### Stress from Uncertainty Scale

1. The uncertainty of patient care often troubles me.
2. Not being sure of what is best for a patient is one of the most stressful parts of being a physician.
3. I am tolerant of the uncertainties present in patient care.
4. I find the uncertainty involved in patient care disconcerting.
5. I usually feel anxious when I am not sure of a diagnosis.
6. When I am uncertain of a diagnosis, I imagine all sorts of bad scenarios-patient dies, patient sues, etc.
7. I am frustrated when I do not know a patient's diagnosis.
8. I fear being held accountable for the limits of my knowledge.
9. Uncertainty in patient care makes me uneasy.
10. I worry about malpractice when I do not know a patient's diagnosis.
11. The vastness of the information that physicians are expected to know overwhelms me.
12. I frequently wish I had gone into a specialty or subspecialty that would minimize the uncertainties of patient care.
13. I am quite comfortable with the uncertainty in patient care.

### Fear of malpractice scale

1. I have had to make significant changes in my practice pattern because of recent legal developments concerning medical delivery.
2. I am concerned that I will be involved in a malpractice case sometime in the next 10 years.
3. I feel pressured in my day-to-day practice by the threat of malpractice litigation.
4. I order some tests or consultations simply to avoid the appearance of malpractice.
5. Sometimes I ask for consultant opinions primarily to reduce my risk of being sued.
6. Relying on clinical judgment rather than on technology to make a diagnosis is becoming riskier from a medicolegal perspective.
